# Supplementary material
Source: PubMed Central journal article supplement (PMC6946059)
Supplement: NIHMS1545237-supplement-1.pdf [file NIHMS1545237-supplement-1.pdf]

Web Appendix Table I. WMH sample characteristics by World Bank income categories <sup>a</sup>

| Country (city) by<br>income category                             | Survey <sup>b</sup>   | Sample characteristics                                                                             | Field<br>dates | Age<br>range | Sample size |          | Response<br>rate <sup>c</sup> |
|------------------------------------------------------------------|-----------------------|----------------------------------------------------------------------------------------------------|----------------|--------------|-------------|----------|-------------------------------|
|                                                                  |                       |                                                                                                    |                |              | Part I      | Part II  |                               |
| <b>I. Low and lower middle income countries</b>                  |                       |                                                                                                    |                |              |             |          |                               |
| Peru (Full country<br>sample that includes<br>Lima)              | EMSMP                 | Five urban areas of the country<br>– approximately 38% of the<br>total national population         | 2004-5         | 18-65        | 3,930       | 1,801    | 90.2                          |
| <b>II. Upper-middle income countries</b>                         |                       |                                                                                                    |                |              |             |          |                               |
| Brazil - São Paulo                                               | São Paulo<br>Megacity | São Paulo metropolitan area                                                                        | 2005-7         | 18-93        | 5,037       | 2,942    | 81.3                          |
| Colombia - Medellín                                              | MMHHS                 | Medellín metropolitan area                                                                         | 2011-12        | 19-65        | 3,261       | 1,673    | 97.2                          |
| Mexico (Full country<br>sample that includes<br>Mexico City)     | M-NCS                 | All urban areas of the country –<br>approximately 75% of the total<br>national population          | 2001-2         | 18-65        | 5,782       | 2,362    | 76.6                          |
| <b>SUBTOTAL</b>                                                  |                       |                                                                                                    |                |              | (14,080)    | (6,977)  | 82.3                          |
| <b>III. High-income countries</b>                                |                       |                                                                                                    |                |              |             |          |                               |
| Argentina (Full<br>country sample that<br>includes Buenos Aires) | AMHES                 | Eight largest urban areas of the<br>country- approximately 50% of<br>the total national population | 2015           | 18-98        | 3,927       | 2,116    | 77.3                          |
| <b>IV. TOTAL</b>                                                 |                       |                                                                                                    |                |              | (21,937)    | (10,894) | 82.7                          |

<sup>a</sup> The World Bank (2012) Data. Accessed May 12, 2012 at: <http://data.worldbank.org/country>. Some of the WMH countries have moved into new income categories since the surveys were conducted. The income groupings above reflect the status of each country at the time of data collection. The current income category of each country is available at the preceding URL.

<sup>b</sup> EMSMP (La Encuesta Mundial de Salud Mental en el Peru); MMHHS (Medellín Mental Health Household Study); M-NCS (The Mexico National Comorbidity Survey); AMHES (Argentina Mental Health Epidemiologic Survey);

<sup>c</sup> The response rate is calculated as the ratio of the number of households in which an interview was completed to the number of households originally sampled, excluding from the denominator households known not to be eligible either because of being vacant at the time of initial contact or because the residents were unable to speak the designated languages of the survey. The weighted average response rate is 82.7%.

Web Appendix Table II. Prevalence of specific past-year mental disorders and categories of disorder among 7,251 residents of 5 cities in Latin America.

|                                              | Men (n = 2,863) |               | Women (n = 4,388) |               | Total (n = 7,251) |               |
|----------------------------------------------|-----------------|---------------|-------------------|---------------|-------------------|---------------|
|                                              | Unweighted<br>n | Weighted<br>% | Unweighted<br>n   | Weighted<br>% | Unweighted<br>n   | Weighted<br>% |
| <i>Individual disorders</i>                  |                 |               |                   |               |                   |               |
| Major Depressive Disorder                    | 199             | 3.35%         | 630               | 8.37%         | 829               | 5.99%         |
| Dysthymia                                    | 18              | 0.33%         | 90                | 1.26%         | 108               | 0.82%         |
| Bipolar and sub-threshold Bipolar disorder   | 65              | 1.24%         | 102               | 1.41%         | 167               | 1.33%         |
| Panic Disorder                               | 27              | 0.38%         | 93                | 1.33%         | 120               | 0.88%         |
| Generalized Anxiety Disorder                 | 51              | 0.69%         | 154               | 2.13%         | 205               | 1.45%         |
| Agoraphobia                                  | 30              | 0.61%         | 123               | 1.45%         | 153               | 1.05%         |
| Social Phobia                                | 117             | 2.35%         | 256               | 3.59%         | 373               | 3.00%         |
| Specific Phobia                              | 236             | 4.42%         | 738               | 11.20%        | 974               | 7.99%         |
| Adult Separation Anxiety Disorder            | 64              | 1.06%         | 113               | 1.58%         | 177               | 1.33%         |
| Posttraumatic Stress Disorder                | 29              | 0.53%         | 114               | 1.46%         | 143               | 1.02%         |
| Alcohol Abuse                                | 197             | 4.15%         | 52                | 0.90%         | 249               | 2.44%         |
| Alcohol Dependence                           | 87              | 1.85%         | 23                | 0.33%         | 110               | 1.05%         |
| Drug Abuse                                   | 62              | 1.32%         | 18                | 0.24%         | 80                | 0.75%         |
| Drug Dependence                              | 33              | 0.66%         | 13                | 0.23%         | 46                | 0.44%         |
| Intermittent Explosive Disorder <sup>a</sup> | 81              | 2.13%         | 107               | 2.39%         | 188               | 2.27%         |
| <i>Combined disorders</i>                    |                 |               |                   |               |                   |               |
| Any mood disorder <sup>b</sup>               | 263             | 4.59%         | 738               | 9.85%         | 1001              | 7.36%         |
| Any anxiety disorder <sup>c</sup>            | 436             | 8.22%         | 1133              | 16.94%        | 1569              | 12.81%        |
| Any substance use disorder <sup>d</sup>      | 254             | 5.48%         | 72                | 1.17%         | 326               | 3.21%         |

<sup>a</sup> Intermittent Explosive Disorder was only assessed in Sao Paulo, Lima, and Buenos Aires; thus, the denominator for this prevalence in the full population is n = 5,118.

<sup>b</sup> Mood disorders include major depressive disorder, dysthymic disorder, and bipolar/sub-threshold bipolar disorders.

<sup>c</sup> Anxiety disorders include posttraumatic stress disorder, panic disorder, specific phobia, social phobia, agoraphobia, adult separation anxiety, and generalized anxiety disorder.

<sup>d</sup> Substance use disorders include alcohol and drug abuse with or without dependence.

Web Appendix Table III. Prevalence of specific violent events, at the individual level, by gender, among 7,251 residents of 5 cities in Latin America.

|                                                                                  | Male (n=2,863) |            | Female (n=4,388) |            |
|----------------------------------------------------------------------------------|----------------|------------|------------------|------------|
|                                                                                  | Unweighted n   | Weighted % | Unweighted n     | Weighted % |
| <i>Individual events</i>                                                         |                |            |                  |            |
| Beaten up by someone other than a spouse or partner                              | 79             | 1.69%      | 47               | 0.82%      |
| Witnessed someone being badly injured or killed, or unexpectedly saw a dead body | 280            | 7.24%      | 321              | 6.94%      |
| Mugged or threatened with a weapon                                               | 441            | 14.23%     | 384              | 8.24%      |
| Been raped, sexually assaulted other than rape, or stalked                       | 43             | 0.88%      | 155              | 2.98%      |
| Experienced any violent event <sup>a</sup>                                       | 713            | 21.14%     | 798              | 17.02%     |

<sup>a</sup> Any violent event includes the individual event types listed, in addition to having seen atrocities; being kidnapped or held captive; or having purposely injured, tortured, or killed someone else - each of which were too rare to show by themselves (less than 1%).

Web Appendix Table IV. Multilevel, multivariable logistic regression models with 2+ types of past-year internalizing disorder <sup>a</sup> as the dependent variable (compared to no or 1 past-year internalizing disorder), among 7,251 residents of 5 cities in Latin America. <sup>b</sup>

|                                                                                  | Beaten up by someone other than spouse or partner |              | Witnessed death or saw someone seriously hurt |              | Mugged or threatened with a weapon |              |
|----------------------------------------------------------------------------------|---------------------------------------------------|--------------|-----------------------------------------------|--------------|------------------------------------|--------------|
|                                                                                  | Odds ratio                                        | 95% CI       | Odds ratio                                    | 95% CI       | Odds ratio                         | 95% CI       |
| <i>Individual-level fixed effects</i>                                            |                                                   |              |                                               |              |                                    |              |
| Age 35-49                                                                        | 1.54                                              | (1.19, 1.99) | 1.55                                          | (1.19, 2.01) | 1.53                               | (1.18, 1.98) |
| Age 50+                                                                          | 1.04                                              | (0.76, 1.43) | 1.04                                          | (0.76, 1.43) | 1.05                               | (0.77, 1.44) |
| Female                                                                           | 2.66                                              | (2.13, 3.33) | 2.67                                          | (2.14, 3.35) | 2.74                               | (2.18, 3.45) |
| Ratio of individual income to median city income                                 | 1.02                                              | (0.97, 1.06) | 1.01                                          | (0.97, 1.06) | 1.01                               | (0.97, 1.06) |
| In top 50% of country-level education                                            | 0.72                                              | (0.55, 0.96) | 0.72                                          | (0.56, 0.96) | 0.73                               | (0.55, 0.96) |
| Married                                                                          | 0.87                                              | (0.70, 1.07) | 0.87                                          | (0.70, 1.07) | 0.88                               | (0.71, 1.08) |
| Migrant to megacity                                                              | 0.93                                              | (0.76, 1.15) | 0.93                                          | (0.76, 1.14) | 0.92                               | (0.75, 1.14) |
| Unemployed                                                                       | 0.99                                              | (0.72, 1.36) | 1.02                                          | (0.74, 1.39) | 1.05                               | (0.77, 1.43) |
| Beaten up by someone other than a spouse or partner                              | 2.66                                              | (1.46, 4.85) | 2.79                                          | (1.51, 5.17) | 3.17                               | (1.77, 5.66) |
| Witnessed someone being badly injured or killed, or unexpectedly saw a dead body | 2.10                                              | (1.49, 2.95) | 2.15                                          | (1.53, 3.02) | 2.19                               | (1.57, 3.07) |
| Mugged or threatened with a weapon                                               | 1.40                                              | (1.02, 1.93) | 1.42                                          | (1.04, 1.95) | 1.41                               | (1.03, 1.93) |
| Raped, sexually assaulted other than rape, or stalked                            | 3.02                                              | (1.79, 5.09) | 2.92                                          | (1.73, 4.94) | 2.73                               | (1.60, 4.66) |
| <i>Neighborhood-level fixed effects</i>                                          |                                                   |              |                                               |              |                                    |              |
| % migrants to city                                                               | 0.99                                              | (0.98, 1.00) | 1.00                                          | (0.99, 1.01) | 1.00                               | (0.99, 1.01) |
| % in top 50% of country-level education                                          | 0.97                                              | (0.95, 0.99) | 0.98                                          | (0.96, 0.99) | 0.98                               | (0.96, 1.00) |
| Middle tertile of % who were beaten up by someone other than spouse or partner   | 1.36                                              | (0.97, 1.91) |                                               |              |                                    |              |

|                                                                             |                   |                             |                   |                             |                   |                             |
|-----------------------------------------------------------------------------|-------------------|-----------------------------|-------------------|-----------------------------|-------------------|-----------------------------|
| Top tertile of % who were beaten up by someone other than spouse or partner | 1.67              | (1.19, 2.35)                |                   |                             |                   |                             |
| Middle tertile of % who witnessed death or saw someone seriously hurt       |                   |                             | 1.21              | (0.78, 1.89)                |                   |                             |
| Top tertile of % who witnessed death or saw someone seriously hurt          |                   |                             | 1.18              | (0.74, 1.90)                |                   |                             |
| Middle tertile of % who were mugged or threatened with a weapon             |                   |                             |                   |                             | 0.93              | (0.64, 1.35)                |
| Top tertile of % who were mugged or threatened with a weapon                |                   |                             |                   |                             | 1.38              | (1.01, 1.89)                |
| <i>Random effects</i>                                                       | Variance estimate | Zero G test <i>p</i> -value | Variance estimate | Zero G test <i>p</i> -value | Variance estimate | Zero G test <i>p</i> -value |
| Intercept                                                                   | 0.0799            | 0.0518                      | 0.1135            | 0.0063                      | 0.0860            | 0.0330                      |

<sup>a</sup> Internalizing disorders include anxiety (posttraumatic stress disorder, panic disorder, specific phobia, social phobia, agoraphobia, adult separation anxiety, generalized anxiety disorder) and mood (major depressive disorder, dysthymic disorder and bipolar/sub-threshold bipolar) disorders.

<sup>b</sup> Each model controls for city as a fixed effect, in addition to the variables listed above.

Table IV *continued*. Multilevel, multivariable logistic regression models with 2+ types of past-year internalizing disorder <sup>a</sup> as the dependent variable (compared to no or 1 past-year internalizing disorder), among 7,251 residents of 5 cities in Latin America. <sup>b</sup>

|                                                                                  | Been sexually assaulted, raped, or stalked |                             | Experienced any violent event <sup>c</sup> |                             |
|----------------------------------------------------------------------------------|--------------------------------------------|-----------------------------|--------------------------------------------|-----------------------------|
|                                                                                  | Odds ratio                                 | 95% CI                      | Odds ratio                                 | 95% CI                      |
| <i>Individual-level fixed effects</i>                                            |                                            |                             |                                            |                             |
| Age 35-49                                                                        | 1.56                                       | (1.20, 2.02)                | 1.56                                       | (1.20, 2.02)                |
| Age 50+                                                                          | 1.06                                       | (0.77, 1.45)                | 1.04                                       | (0.76, 1.43)                |
| Female                                                                           | 2.67                                       | (2.13, 3.34)                | 2.69                                       | (2.15, 3.37)                |
| Ratio of individual income to median city income                                 | 1.01                                       | (0.97, 1.06)                | 1.02                                       | (0.97, 1.07)                |
| In top 50% of country-level education                                            | 0.72                                       | (0.55, 0.96)                | 0.72                                       | (0.54, 0.95)                |
| Married                                                                          | 0.86                                       | (0.70, 1.06)                | 0.87                                       | (0.71, 1.08)                |
| Migrant to megacity                                                              | 0.93                                       | (0.76, 1.15)                | 0.93                                       | (0.76, 1.15)                |
| Unemployed                                                                       | 1.01                                       | (0.73, 1.39)                | 1.07                                       | (0.79, 1.45)                |
| Beaten up by someone other than a spouse or partner                              | 2.90                                       | (1.58, 5.33)                | 3.16                                       | (1.77, 5.62)                |
| Witnessed someone being badly injured or killed, or unexpectedly saw a dead body | 2.13                                       | (1.52, 2.99)                | 2.08                                       | (1.49, 2.92)                |
| Mugged or threatened with a weapon                                               | 1.41                                       | (1.02, 1.93)                | 1.42                                       | (1.03, 1.94)                |
| Been raped, sexually assaulted other than rape, or stalked                       | 2.88                                       | (1.72, 4.82)                | 2.88                                       | (1.70, 4.85)                |
| <i>Neighborhood-level fixed effects</i>                                          |                                            |                             |                                            |                             |
| % migrants to city                                                               | 0.99                                       | (0.98, 1.00)                | 1.00                                       | (0.99, 1.01)                |
| % in top 50% of country-level education                                          | 0.97                                       | (0.95, 0.99)                | 0.98                                       | (0.96, 1.00)                |
| Middle tertile of % who were sexually assaulted, raped, or stalked               | 0.96                                       | (0.66, 1.38)                |                                            |                             |
| Top tertile of % who were sexually assaulted, raped, or stalked                  | 1.34                                       | (0.97, 1.84)                |                                            |                             |
| Middle tertile of % who experienced any violent event                            |                                            |                             | 1.52                                       | (1.03, 2.25)                |
| Top tertile of % who experienced any violent event                               |                                            |                             | 1.73                                       | (1.19, 2.52)                |
| <i>Random effects</i>                                                            |                                            |                             |                                            |                             |
|                                                                                  | Variance estimate                          | Zero G test <i>p</i> -value | Variance estimate                          | Zero G test <i>p</i> -value |
| Intercept                                                                        | 0.1024                                     | 0.0263                      | 0.0719                                     | 0.0985                      |

<sup>a</sup> Internalizing disorders include anxiety (posttraumatic stress disorder, panic disorder, specific phobia, social phobia, agoraphobia, adult separation anxiety, generalized anxiety disorder) and mood (major depressive disorder, dysthymic disorder and bipolar/sub-threshold bipolar) disorders.

<sup>b</sup> Each model controls for city as a fixed effect, in addition to the variables listed above.

<sup>c</sup> Any violent event includes the individual event types listed, in addition to having seen atrocities; being kidnapped or held captive; or having purposely injured, tortured, or killed someone else - each of which were too rare to show by themselves (less than 1%).

Web Appendix Table V. Sensitivity analysis dropping 20% of the smallest neighborhoods (10% of the total sample): Multilevel, multivariable logistic regression models with past-year internalizing disorder <sup>a</sup> as the dependent variable among 6,531 residents of 5 cities in Latin America.

|                                                                                  | Beaten up by someone other than spouse or partner |              | Witnessed death or saw someone seriously hurt |              | Mugged or threatened with a weapon |              |
|----------------------------------------------------------------------------------|---------------------------------------------------|--------------|-----------------------------------------------|--------------|------------------------------------|--------------|
|                                                                                  | Odds ratio                                        | 95% CI       | Odds ratio                                    | 95% CI       | Odds ratio                         | 95% CI       |
| <i>Individual-level fixed effects</i>                                            |                                                   |              |                                               |              |                                    |              |
| Age 35-49                                                                        | 1.19                                              | (1.00, 1.42) | 1.20                                          | (1.00, 1.43) | 1.20                               | (1.00, 1.43) |
| Age 50+                                                                          | 0.88                                              | (0.70, 1.10) | 0.87                                          | (0.70, 1.09) | 0.87                               | (0.70, 1.09) |
| Female                                                                           | 2.48                                              | (2.15, 2.87) | 2.49                                          | (2.15, 2.87) | 2.48                               | (2.15, 2.86) |
| Ratio of individual income to median city income                                 | 1.00                                              | (0.96, 1.04) | 1.00                                          | (0.96, 1.04) | 1.00                               | (0.96, 1.04) |
| In top 50% of country-level education                                            | 0.76                                              | (0.64, 0.90) | 0.78                                          | (0.66, 0.92) | 0.78                               | (0.66, 0.92) |
| Married                                                                          | 0.83                                              | (0.70, 0.99) | 0.83                                          | (0.70, 0.99) | 0.83                               | (0.69, 0.98) |
| Migrant to megacity                                                              | 0.94                                              | (0.80, 1.11) | 0.96                                          | (0.82, 1.13) | 0.96                               | (0.82, 1.13) |
| Unemployed                                                                       | 1.18                                              | (0.92, 1.52) | 1.17                                          | (0.91, 1.51) | 1.16                               | (0.90, 1.49) |
| Beaten up by someone other than a spouse or partner                              | 2.86                                              | (1.58, 5.18) | 2.67                                          | (1.44, 4.95) | 2.77                               | (1.51, 5.10) |
| Witnessed someone being badly injured or killed, or unexpectedly saw a dead body | 1.41                                              | (1.04, 1.91) | 1.42                                          | (1.05, 1.93) | 1.45                               | (1.07, 1.95) |
| Mugged or threatened with a weapon                                               | 1.25                                              | (0.97, 1.62) | 1.25                                          | (0.97, 1.61) | 1.21                               | (0.94, 1.56) |
| Raped, sexually assaulted other than rape, or stalked                            | 1.92                                              | (1.32, 2.79) | 1.95                                          | (1.33, 2.85) | 1.94                               | (1.31, 2.85) |
| <i>Neighborhood-level fixed effects</i>                                          |                                                   |              |                                               |              |                                    |              |
| % migrants to city                                                               | 0.99                                              | (0.99, 1.00) | 0.99                                          | (0.99, 1.00) | 0.99                               | (0.99, 1.00) |
| % in top 50% of country-level education                                          | 0.98                                              | (0.97, 0.99) | 0.98                                          | (0.97, 1.00) | 0.98                               | (0.97, 1.00) |
| Middle tertile of % who were beaten up by someone other than spouse or partner   | 1.32                                              | (1.06, 1.64) |                                               |              |                                    |              |
| Top tertile of % who were beaten up by someone other than spouse or partner      | 1.52                                              | (1.21, 1.91) |                                               |              |                                    |              |

|                                                                       |                   |                             |                   |                             |                   |                             |
|-----------------------------------------------------------------------|-------------------|-----------------------------|-------------------|-----------------------------|-------------------|-----------------------------|
| Middle tertile of % who witnessed death or saw someone seriously hurt |                   |                             | 1.05              | (0.79, 1.38)                |                   |                             |
| Top tertile of % who witnessed death or saw someone seriously hurt    |                   |                             | 1.28              | (0.94, 1.73)                |                   |                             |
| Middle tertile of % who were mugged or threatened with a weapon       |                   |                             |                   |                             | 1.08              | (0.85, 1.39)                |
| Top tertile of % who were mugged or threatened with a weapon          |                   |                             |                   |                             | 1.33              | (1.07, 1.66)                |
| <i>Random effects</i>                                                 | Variance estimate | Zero G test <i>p</i> -value | Variance estimate | Zero G test <i>p</i> -value | Variance estimate | Zero G test <i>p</i> -value |
| Intercept                                                             | 0.0420            | 0.0029                      | 0.0618            | 0.0001                      | 0.0594            | 0.0008                      |

Each model controls for city, in addition to the variables listed above.

<sup>a</sup> Internalizing disorders include anxiety (posttraumatic stress disorder, panic disorder, specific phobia, social phobia, agoraphobia, adult separation anxiety, generalized anxiety disorder) and mood (major depressive disorder, dysthymic disorder and bipolar/sub-threshold bipolar) disorders.



Appendix Table V *continued*. Sensitivity analysis dropping 20% of the smallest neighborhoods (10% of the total sample): Multilevel, multivariable logistic regression models with past-year internalizing disorder <sup>a</sup> as the dependent variable among 6,531 residents of 5 cities in Latin America.

|                                                                                  | Sexually assaulted, raped, or stalked |                             | Experienced any violent event <sup>b</sup> |                             |
|----------------------------------------------------------------------------------|---------------------------------------|-----------------------------|--------------------------------------------|-----------------------------|
|                                                                                  | Odds ratio                            | 95% CI                      | Odds ratio                                 | 95% CI                      |
| <i>Individual-level fixed effects</i>                                            |                                       |                             |                                            |                             |
| Age 35-49                                                                        | 1.20                                  | (1.00, 1.43)                | 1.20                                       | (1.01, 1.44)                |
| Age 50+                                                                          | 0.87                                  | (0.70, 1.09)                | 0.88                                       | (0.70, 1.10)                |
| Female                                                                           | 2.49                                  | (2.16, 2.88)                | 2.49                                       | (2.16, 2.88)                |
| Ratio of individual income to median city income                                 | 1.00                                  | (0.96, 1.04)                | 1.00                                       | (0.96, 1.04)                |
| In top 50% of country-level education                                            | 0.78                                  | (0.66, 0.92)                | 0.79                                       | (0.67, 0.93)                |
| Married                                                                          | 0.83                                  | (0.69, 0.98)                | 0.83                                       | (0.70, 0.99)                |
| Migrant to megacity                                                              | 0.96                                  | (0.82, 1.13)                | 0.96                                       | (0.82, 1.13)                |
| Unemployed                                                                       | 1.16                                  | (0.90, 1.50)                | 1.15                                       | (0.90, 1.49)                |
| Beaten up by someone other than a spouse or partner                              | 2.82                                  | (1.53, 5.20)                | 2.83                                       | (1.55, 5.19)                |
| Witnessed someone being badly injured or killed, or unexpectedly saw a dead body | 1.45                                  | (1.07, 1.96)                | 1.44                                       | (1.07, 1.95)                |
| Mugged or threatened with a weapon                                               | 1.24                                  | (0.96, 1.60)                | 1.22                                       | (0.94, 1.57)                |
| Been raped, sexually assaulted other than rape, or stalked                       | 1.93                                  | (1.32, 2.84)                | 1.95                                       | (1.32, 2.87)                |
| <i>Neighborhood-level fixed effects</i>                                          |                                       |                             |                                            |                             |
| % migrants to city                                                               | 0.99                                  | (0.98, 1.00)                | 0.99                                       | (0.99, 1.00)                |
| % in top 50% of country-level education                                          | 0.98                                  | (0.97, 0.99)                | 0.98                                       | (0.97, 1.00)                |
| Middle tertile of % who were sexually assaulted, raped, or stalked               | 0.92                                  | (0.72, 1.19)                |                                            |                             |
| Top tertile of % who were sexually assaulted, raped, or stalked                  | 1.07                                  | (0.84, 1.37)                |                                            |                             |
| Middle tertile of % who experienced any violent event                            |                                       |                             | 1.38                                       | (1.09, 1.74)                |
| Top tertile of % who experienced any violent event                               |                                       |                             | 1.53                                       | (1.21, 1.92)                |
| <i>Random effects</i>                                                            |                                       |                             |                                            |                             |
|                                                                                  | Variance estimate                     | Zero G test <i>p</i> -value | Variance estimate                          | Zero G test <i>p</i> -value |
| Intercept                                                                        | 0.0705                                | <0.0001                     | 0.0431                                     | 0.0152                      |

Each model controls for city, in addition to the variables listed above.

<sup>a</sup> Internalizing disorders include anxiety (posttraumatic stress disorder, panic disorder, specific phobia, social phobia, agoraphobia, adult separation anxiety, generalized anxiety disorder) and mood (major depressive disorder, dysthymic disorder and bipolar/sub-threshold bipolar) disorders.

<sup>b</sup> Any violent event includes the individual event types listed, in addition to having seen atrocities; being kidnapped or held captive; or having purposely injured, tortured, or killed someone else - each of which were too rare to model by themselves.

Web Appendix Table VI. Sensitivity analysis dropping 20% of the smallest neighborhoods (10% of the total sample): Multilevel, multivariable logistic regression models with past-year externalizing disorder <sup>a</sup> as the dependent variable among 6,531 residents of 5 cities in Latin America.

|                                                                                     | Beaten up by someone other than spouse or partner |              | Witnessed death or saw someone seriously hurt |              | Mugged or threatened with a weapon |              |
|-------------------------------------------------------------------------------------|---------------------------------------------------|--------------|-----------------------------------------------|--------------|------------------------------------|--------------|
|                                                                                     | Odds ratio                                        | 95% CI       | Odds ratio                                    | 95% CI       | Odds ratio                         | 95% CI       |
| <i>Individual-level fixed effects</i>                                               |                                                   |              |                                               |              |                                    |              |
| Age 35-49                                                                           | 0.64                                              | (0.50, 0.82) | 0.64                                          | (0.50, 0.82) | 0.64                               | (0.50, 0.81) |
| Age 50+                                                                             | 0.27                                              | (0.16, 0.43) | 0.27                                          | (0.16, 0.43) | 0.26                               | (0.16, 0.43) |
| Female                                                                              | 0.39                                              | (0.31, 0.50) | 0.39                                          | (0.31, 0.50) | 0.39                               | (0.31, 0.50) |
| Ratio of individual income to median city income                                    | 1.02                                              | (0.95, 1.09) | 1.02                                          | (0.95, 1.09) | 1.02                               | (0.95, 1.09) |
| In top 50% of country-level education                                               | 0.71                                              | (0.56, 0.90) | 0.71                                          | (0.56, 0.90) | 0.71                               | (0.56, 0.91) |
| Married                                                                             | 0.91                                              | (0.69, 1.20) | 0.91                                          | (0.69, 1.20) | 0.91                               | (0.69, 1.19) |
| Migrant to megacity                                                                 | 0.97                                              | (0.72, 1.30) | 0.97                                          | (0.72, 1.31) | 0.97                               | (0.72, 1.31) |
| Unemployed                                                                          | 2.33                                              | (1.61, 3.35) | 2.34                                          | (1.63, 3.37) | 2.33                               | (1.62, 3.37) |
| Beaten up by someone other than a spouse or partner                                 | 4.16                                              | (2.70, 6.39) | 4.22                                          | (2.68, 6.65) | 4.29                               | (2.73, 6.75) |
| Witnessed someone being badly injured or killed, or unexpectedly seeing a dead body | 1.64                                              | (1.18, 2.27) | 1.65                                          | (1.19, 2.29) | 1.64                               | (1.18, 2.27) |
| Mugged or threatened with a weapon                                                  | 0.89                                              | (0.64, 1.23) | 0.88                                          | (0.63, 1.23) | 0.88                               | (0.63, 1.23) |
| Been raped, sexually assaulted other than rape, or stalked                          | 2.61                                              | (1.40, 4.86) | 2.60                                          | (1.40, 4.84) | 2.63                               | (1.42, 4.87) |
| <i>Neighborhood-level fixed effects</i>                                             |                                                   |              |                                               |              |                                    |              |
| % unemployed                                                                        | 1.03                                              | (0.99, 1.07) | 1.03                                          | (0.99, 1.07) | 1.03                               | (0.99, 1.07) |
| % in top 50% of country-level education                                             | 0.99                                              | (0.97, 1.01) | 0.99                                          | (0.97, 1.01) | 0.99                               | (0.97, 1.01) |
| Middle tertile of % who were beaten up by someone other than spouse or partner      | 0.94                                              | (0.67, 1.31) |                                               |              |                                    |              |
| Top tertile of % who were beaten up by someone other than spouse or partner         | 1.09                                              | (0.77, 1.53) |                                               |              |                                    |              |
| Middle tertile of % who witnessed death or saw someone seriously hurt               |                                                   |              | 0.90                                          | (0.67, 1.22) |                                    |              |

|                                                                    |                   |                             |                   |                             |                   |                             |
|--------------------------------------------------------------------|-------------------|-----------------------------|-------------------|-----------------------------|-------------------|-----------------------------|
| Top tertile of % who witnessed death or saw someone seriously hurt |                   |                             | 0.98              | (0.68, 1.40)                |                   |                             |
| Middle tertile of % who were mugged or threatened with a weapon    |                   |                             |                   |                             | 0.92              | (0.68, 1.25)                |
| Top tertile of % who were mugged or threatened with a weapon       |                   |                             |                   |                             | 0.95              | (0.65, 1.37)                |
| <i>Random effects</i>                                              | Variance estimate | Zero G test <i>p</i> -value | Variance estimate | Zero G test <i>p</i> -value | Variance estimate | Zero G test <i>p</i> -value |
| Intercept                                                          | 0.0772            | 0.0379                      | 0.0769            | 0.0378                      | 0.0785            | 0.0416                      |

Each model controls for city, in addition to the variables listed above.

<sup>a</sup> Externalizing disorders include behavioral (intermittent explosive disorder) and substance use (alcohol and drug abuse with or without dependence) disorders.

Appendix Table VI *continued*. Sensitivity analysis dropping 20% of the smallest neighborhoods (10% of the total sample): Multilevel, multivariable logistic regression models with past-year externalizing disorder <sup>a</sup> as the dependent variable among 6,531 residents of 5 cities in Latin America.

|                                                                                     | Sexually assaulted, raped, or stalked |                             | Experienced any violent event <sup>b</sup> |                             |
|-------------------------------------------------------------------------------------|---------------------------------------|-----------------------------|--------------------------------------------|-----------------------------|
|                                                                                     | Odds ratio                            | 95% CI                      | Odds ratio                                 | 95% CI                      |
| <i>Individual-level fixed effects</i>                                               |                                       |                             |                                            |                             |
| Age 35-49                                                                           | 0.64                                  | (0.51, 0.82)                | 0.64                                       | (0.50, 0.82)                |
| Age 50+                                                                             | 0.27                                  | (0.16, 0.43)                | 0.26                                       | (0.16, 0.43)                |
| Female                                                                              | 0.39                                  | (0.31, 0.49)                | 0.39                                       | (0.31, 0.50)                |
| Ratio of individual income to median city income                                    | 1.02                                  | (0.95, 1.09)                | 1.02                                       | (0.95, 1.09)                |
| In top 50% of country-level education                                               | 0.71                                  | (0.56, 0.91)                | 0.71                                       | (0.56, 0.91)                |
| Married                                                                             | 0.91                                  | (0.69, 1.19)                | 0.91                                       | (0.69, 1.19)                |
| Migrant to megacity                                                                 | 0.98                                  | (0.73, 1.31)                | 0.97                                       | (0.72, 1.30)                |
| Unemployed                                                                          | 2.35                                  | (1.63, 3.38)                | 2.32                                       | (1.61, 3.35)                |
| Beaten up by someone other than a spouse or partner                                 | 4.27                                  | (2.72, 6.69)                | 4.28                                       | (2.73, 6.70)                |
| Witnessed someone being badly injured or killed, or unexpectedly seeing a dead body | 1.65                                  | (1.19, 2.28)                | 1.66                                       | (1.20, 2.30)                |
| Mugged or threatened with a weapon                                                  | 0.87                                  | (0.63, 1.21)                | 0.89                                       | (0.64, 1.24)                |
| Been raped, sexually assaulted other than rape, or stalked                          | 2.54                                  | (1.38, 4.67)                | 2.61                                       | (1.41, 4.85)                |
| <i>Neighborhood-level fixed effects</i>                                             |                                       |                             |                                            |                             |
| % unemployed                                                                        | 1.02                                  | (0.99, 1.06)                | 1.03                                       | (0.99, 1.07)                |
| % in top 50% of country-level education                                             | 0.99                                  | (0.97, 1.01)                | 0.99                                       | (0.97, 1.01)                |
| Middle tertile of % who were sexually assaulted, raped, or stalked                  | 1.22                                  | (0.89, 1.68)                |                                            |                             |
| Top tertile of % who were sexually assaulted, raped, or stalked                     | 1.29                                  | (0.96, 1.74)                |                                            |                             |
| Middle tertile of % who experienced any violent event                               |                                       |                             | 0.81                                       | (0.57, 1.16)                |
| Top tertile of % who experienced any violent event                                  |                                       |                             | 0.86                                       | (0.61, 1.22)                |
| <i>Random effects</i>                                                               |                                       |                             |                                            |                             |
|                                                                                     | Variance estimate                     | Zero G test <i>p</i> -value | Variance estimate                          | Zero G test <i>p</i> -value |
| Intercept                                                                           | 0.0655                                | 0.0765                      | 0.0683                                     | 0.0719                      |

Each model controls for city, in addition to the variables listed above.

<sup>a</sup> Externalizing disorders include behavioral (intermittent explosive disorder) and substance use (alcohol and drug abuse with or without dependence) disorders.

<sup>b</sup> Any violent event includes the individual event types listed, in addition to having seen atrocities; being kidnapped or held captive; or having purposely injured, tortured, or killed someone else - each of which were too rare to model by themselves.

Web Appendix Table VII. Multilevel, multivariable logistic regression models with any past-year mood disorder<sup>a</sup> as the dependent variable among 7,251 residents of 5 cities in Latin America.

|                                                                                  | Beaten up by someone other than spouse or partner |              | Witnessed death or saw someone seriously hurt |              | Mugged or threatened with a weapon |              |
|----------------------------------------------------------------------------------|---------------------------------------------------|--------------|-----------------------------------------------|--------------|------------------------------------|--------------|
|                                                                                  | Odds ratio                                        | 95% CI       | Odds ratio                                    | 95% CI       | Odds ratio                         | 95% CI       |
| <i>Individual-level fixed effects</i>                                            |                                                   |              |                                               |              |                                    |              |
| Age 35-49                                                                        | 1.29                                              | (1.04, 1.59) | 1.27                                          | (1.03, 1.58) | 1.29                               | (1.04, 1.61) |
| Age 50+                                                                          | 0.78                                              | (0.57, 1.07) | 0.78                                          | (0.57, 1.07) | 0.78                               | (0.58, 1.07) |
| Female                                                                           | 2.39                                              | (1.98, 2.89) | 2.37                                          | (1.96, 2.82) | 2.40                               | (1.98, 2.91) |
| Ratio of individual income to median city income                                 | 1.00                                              | (0.96, 1.04) | 1.00                                          | (0.96, 1.04) | 1.00                               | (0.96, 1.04) |
| In top 50% of country-level education                                            | 0.85                                              | (0.65, 1.01) | 0.84                                          | (0.64, 1.00) | 0.85                               | (0.65, 1.11) |
| Married                                                                          | 0.75                                              | (0.61, 0.93) | 0.74                                          | (0.60, 0.91) | 0.75                               | (0.61, 0.93) |
| Migrant to megacity                                                              | 0.92                                              | (0.72, 1.18) | 0.93                                          | (0.73, 1.18) | 0.92                               | (0.72, 1.17) |
| Unemployed                                                                       | 1.07                                              | (0.77, 1.49) | 1.05                                          | (0.75, 1.47) | 1.09                               | (0.78, 1.51) |
| Beaten up by someone other than a spouse or partner                              | 3.97                                              | (2.22, 7.11) | 3.70                                          | (2.03, 6.72) | 4.32                               | (2.43, 7.66) |
| Witnessed someone being badly injured or killed, or unexpectedly saw a dead body | 1.93                                              | (1.29, 2.90) | 1.91                                          | (1.27, 2.89) | 1.95                               | (1.30, 2.93) |
| Mugged or threatened with a weapon                                               | 1.25                                              | (0.95, 1.65) | 1.23                                          | (0.93, 1.62) | 1.22                               | (0.93, 1.60) |
| Raped, sexually assaulted other than rape, or stalked                            | 1.98                                              | (1.32, 2.98) | 2.13                                          | (1.42, 3.14) | 1.97                               | (1.31, 2.96) |
| <i>Neighborhood-level fixed effects</i>                                          |                                                   |              |                                               |              |                                    |              |
| % migrants to city                                                               | 1.00                                              | (0.99, 1.01) | 1.00                                          | (0.99, 1.01) | 1.00                               | (1.00, 1.01) |
| % in top 50% of country-level education                                          | 1.00                                              | (0.98, 1.01) | 0.99                                          | (0.97, 1.00) | 1.00                               | (0.99, 1.01) |
| Middle tertile of % who were beaten up by someone other than spouse or partner   | 1.28                                              | (0.96, 1.70) |                                               |              |                                    |              |
| Top tertile of % who were beaten up by someone other than spouse or partner      | 1.36                                              | (0.99, 1.87) |                                               |              |                                    |              |

|                                                                       |                   |                             |                   |                             |                   |                             |
|-----------------------------------------------------------------------|-------------------|-----------------------------|-------------------|-----------------------------|-------------------|-----------------------------|
| Middle tertile of % who witnessed death or saw someone seriously hurt |                   |                             | 0.99              | (0.73, 1.36)                |                   |                             |
| Top tertile of % who witnessed death or saw someone seriously hurt    |                   |                             | 1.01              | (0.73, 1.40)                |                   |                             |
| Middle tertile of % who were mugged or threatened with a weapon       |                   |                             |                   |                             | 0.86              | (0.65, 1.16)                |
| Top tertile of % who were mugged or threatened with a weapon          |                   |                             |                   |                             | 1.41              | (1.12, 1.77)                |
| <i>Random effects</i>                                                 | Variance estimate | Zero G test <i>p</i> -value | Variance estimate | Zero G test <i>p</i> -value | Variance estimate | Zero G test <i>p</i> -value |
| Intercept                                                             | 0.0580            | 0.0121                      | 0.0844            | 0.0040                      | 0.0368            | 0.1060                      |

Each model controls for city as a fixed effect, in addition to the variables listed above.

<sup>a</sup> Mood disorders include major depressive disorder, dysthymic disorder, and bipolar/sub-threshold bipolar disorders.

Table VII *continued*. Multilevel, multivariable logistic regression models with any past-year mood disorder <sup>a</sup> as the dependent variable among 7,251 residents of 5 cities in Latin America.

|                                                                                  | Been sexually assaulted, raped, or stalked |                             | Experienced any violent event <sup>c</sup> |                             |
|----------------------------------------------------------------------------------|--------------------------------------------|-----------------------------|--------------------------------------------|-----------------------------|
|                                                                                  | Odds ratio                                 | 95% CI                      | Odds ratio                                 | 95% CI                      |
| <i>Individual-level fixed effects</i>                                            |                                            |                             |                                            |                             |
| Age 35-49                                                                        | 1.25                                       | (1.01, 1.55)                | 1.27                                       | (1.00, 1.40)                |
| Age 50+                                                                          | 0.79                                       | (0.58, 1.07)                | 0.93                                       | (0.76, 1.12)                |
| Female                                                                           | 2.41                                       | (2.00, 2.92)                | 2.39                                       | (2.01, 2.85)                |
| Ratio of individual income to median city income                                 | 1.00                                       | (0.97, 1.05)                | 0.99                                       | (0.97, 1.02)                |
| In top 50% of country-level education                                            | 0.83                                       | (0.64, 1.09)                | 0.75                                       | (0.62, 0.91)                |
| Married                                                                          | 0.74                                       | (0.60, 0.92)                | 0.81                                       | (0.70, 0.95)                |
| Migrant to megacity                                                              | 0.93                                       | (0.73, 1.19)                | 0.94                                       | (0.77, 1.15)                |
| Unemployed                                                                       | 1.10                                       | (0.79, 1.53)                | 1.18                                       | (0.90, 1.55)                |
| Beaten up by someone other than a spouse or partner                              | 4.25                                       | (2.38, 7.60)                | 2.78                                       | (1.57, 4.95)                |
| Witnessed someone being badly injured or killed, or unexpectedly saw a dead body | 1.92                                       | (1.28, 2.89)                | 1.47                                       | (1.16, 1.87)                |
| Mugged or threatened with a weapon                                               | 1.27                                       | (0.96, 1.66)                | 1.22                                       | (0.97, 1.55)                |
| Been raped, sexually assaulted other than rape, or stalked                       | 2.06                                       | (1.37, 3.09)                | 1.98                                       | (1.22, 3.24)                |
| <i>Neighborhood-level fixed effects</i>                                          |                                            |                             |                                            |                             |
| % migrants to city                                                               | 0.99                                       | (0.99, 1.00)                | 1.00                                       | (0.99, 1.01)                |
| % in top 50% of country-level education                                          | 0.99                                       | (0.97, 1.00)                | 1.00                                       | (0.99, 1.01)                |
| Middle tertile of % who were sexually assaulted, raped, or stalked               | 0.78                                       | (0.58, 1.04)                |                                            |                             |
| Top tertile of % who were sexually assaulted, raped, or stalked                  | 1.01                                       | (0.77, 1.33)                |                                            |                             |
| Middle tertile of % who experienced any violent event                            |                                            |                             | 1.25                                       | (0.94, 1.67)                |
| Top tertile of % who experienced any violent event                               |                                            |                             | 1.62                                       | (1.21, 2.17)                |
| <i>Random effects</i>                                                            |                                            |                             |                                            |                             |
|                                                                                  | Variance estimate                          | Zero G test <i>p</i> -value | Variance estimate                          | Zero G test <i>p</i> -value |
| Intercept                                                                        | 0.0697                                     | 0.0070                      | 0.0388                                     | 0.0873                      |

Each model controls for city as a fixed effect, in addition to the variables listed above.

<sup>a</sup> Mood disorders include major depressive disorder, dysthymic disorder, and bipolar/sub-threshold bipolar disorders.

<sup>c</sup> Any violent event includes the individual event types listed, in addition to having seen atrocities; being kidnapped or held captive; or having purposely injured, tortured, or killed someone else - each of which were too rare to model by themselves.

Web Appendix Table VIII. Multilevel, multivariable logistic regression models with any past-year anxiety disorder <sup>a</sup> as the dependent variable among 7,251 residents of 5 cities in Latin America. <sup>b</sup>

|                                                                                  | Beaten up by someone other than spouse or partner |              | Witnessed death or saw someone seriously hurt |              | Mugged or threatened with a weapon |              |
|----------------------------------------------------------------------------------|---------------------------------------------------|--------------|-----------------------------------------------|--------------|------------------------------------|--------------|
|                                                                                  | Odds ratio                                        | 95% CI       | Odds ratio                                    | 95% CI       | Odds ratio                         | 95% CI       |
| <i>Individual-level fixed effects</i>                                            |                                                   |              |                                               |              |                                    |              |
| Age 35-49                                                                        | 1.22                                              | (1.02, 1.45) | 1.22                                          | (1.02, 1.46) | 1.21                               | (1.01, 1.46) |
| Age 50+                                                                          | 1.02                                              | (0.84, 1.24) | 1.03                                          | (0.85, 1.26) | 1.03                               | (0.85, 1.26) |
| Female                                                                           | 2.21                                              | (1.91, 2.55) | 2.27                                          | (1.96, 2.62) | 2.28                               | (1.97, 2.62) |
| Ratio of individual income to median city income                                 | 1.00                                              | (0.96, 1.05) | 1.00                                          | (0.96, 1.05) | 1.00                               | (0.96, 1.05) |
| In top 50% of country-level education                                            | 0.71                                              | (0.59, 0.86) | 0.72                                          | (0.60, 0.88) | 0.72                               | (0.60, 0.87) |
| Married                                                                          | 0.85                                              | (0.71, 1.01) | 0.88                                          | (0.74, 1.05) | 0.87                               | (0.73, 1.04) |
| Migrant to megacity                                                              | 0.93                                              | (0.79, 1.09) | 0.95                                          | (0.81, 1.11) | 0.95                               | (0.81, 1.11) |
| Unemployed                                                                       | 1.16                                              | (0.91, 1.48) | 1.16                                          | (0.91, 1.49) | 1.16                               | (0.91, 1.48) |
| Beaten up by someone other than a spouse or partner                              | 1.57                                              | (0.90, 2.76) | 1.76                                          | (1.00, 3.10) | 1.75                               | (0.99, 3.04) |
| Witnessed someone being badly injured or killed, or unexpectedly saw a dead body | 1.27                                              | (1.00, 1.61) | 1.24                                          | (0.97, 1.58) | 1.27                               | (1.00, 1.61) |
| Mugged or threatened with a weapon                                               | 1.19                                              | (0.91, 1.56) | 1.20                                          | (0.91, 1.57) | 1.18                               | (0.90, 1.55) |
| Been raped, sexually assaulted other than rape, or stalked                       | 2.03                                              | (1.36, 3.02) | 2.08                                          | (1.40, 3.08) | 2.07                               | (1.39, 3.08) |
| <i>Neighborhood-level fixed effects</i>                                          |                                                   |              |                                               |              |                                    |              |
| % unemployed                                                                     | 0.99                                              | (0.99, 1.00) | 0.99                                          | (0.99, 1.00) | 1.00                               | (0.94, 1.00) |
| % in top 50% of country-level education                                          | 0.98                                              | (0.96, 0.99) | 0.98                                          | (0.97, 0.99) | 0.98                               | (0.96, 0.99) |
| Middle tertile of % who were beaten up by someone other than spouse or partner   | 1.42                                              | (1.14, 1.78) |                                               |              |                                    |              |
| Top tertile of % who were beaten up by someone other than spouse or partner      | 1.55                                              | (1.24, 1.94) |                                               |              |                                    |              |
| Middle tertile of % who witnessed death or saw someone seriously hurt            |                                                   |              | 1.23                                          | (0.89, 1.70) |                                    |              |
| Top tertile of % who witnessed death or saw someone seriously hurt               |                                                   |              | 1.45                                          | (1.01, 2.08) |                                    |              |
| Middle tertile of % who were mugged or threatened with a weapon                  |                                                   |              |                                               |              | 1.04                               | (0.80, 1.35) |
| Top tertile of % who were mugged or threatened with a                            |                                                   |              |                                               |              | 1.24                               | (0.97, 1.59) |



| weapon                |                   |                             |                   |                             |                   |                             |
|-----------------------|-------------------|-----------------------------|-------------------|-----------------------------|-------------------|-----------------------------|
| <i>Random effects</i> | Variance estimate | Zero G test <i>p</i> -value | Variance estimate | Zero G test <i>p</i> -value | Variance estimate | Zero G test <i>p</i> -value |
| Intercept             | 0.0411            | 0.0508                      | 0.0569            | 0.0023                      | 0.0650            | 0.0011                      |

<sup>a</sup> Anxiety disorders include posttraumatic stress disorder, panic disorder, specific phobia, social phobia, agoraphobia, adult separation anxiety, and generalized anxiety disorder.

<sup>b</sup> Each model controls for city as a fixed effect, in addition to the variables listed above.

Appendix Table VIII *continued*. Multilevel, multivariable logistic regression models with any past-year anxiety disorder <sup>a</sup> as the dependent variable among 7,251 residents of 5 cities in Latin America. <sup>b</sup>

|                                                                                  | Been sexually assaulted, raped, or stalked |                             | Experienced any violent event <sup>c</sup> |                             |
|----------------------------------------------------------------------------------|--------------------------------------------|-----------------------------|--------------------------------------------|-----------------------------|
|                                                                                  | Odds ratio                                 | 95% CI                      | Odds ratio                                 | 95% CI                      |
| <i>Individual-level fixed effects</i>                                            |                                            |                             |                                            |                             |
| Age 35-49                                                                        | 1.23                                       | (1.02, 1.47)                | 1.21                                       | (1.01, 1.45)                |
| Age 50+                                                                          | 1.03                                       | (0.84, 1.25)                | 1.04                                       | (0.85, 1.27)                |
| Female                                                                           | 2.22                                       | (1.92, 2.56)                | 2.27                                       | (1.97, 2.62)                |
| Ratio of individual income to median city income                                 | 1.00                                       | (0.96, 1.05)                | 1.00                                       | (0.96, 1.05)                |
| In top 50% of country-level education                                            | 0.71                                       | (0.59, 0.86)                | 0.72                                       | (0.60, 0.87)                |
| Married                                                                          | 0.85                                       | (0.71, 1.01)                | 0.88                                       | (0.73, 1.05)                |
| Migrant to megacity                                                              | 0.93                                       | (0.79, 1.09)                | 0.95                                       | (0.81, 1.11)                |
| Unemployed                                                                       | 1.17                                       | (0.92, 1.49)                | 1.14                                       | (0.90, 1.54)                |
| Beaten up by someone other than a spouse or partner                              | 1.67                                       | (0.94, 2.96)                | 1.74                                       | (0.99, 3.07)                |
| Witnessed someone being badly injured or killed, or unexpectedly saw a dead body | 1.28                                       | (1.01, 1.63)                | 1.25                                       | (0.99, 1.59)                |
| Mugged or threatened with a weapon                                               | 1.20                                       | (0.91, 1.57)                | 1.18                                       | (0.90, 1.54)                |
| Been raped, sexually assaulted other than rape, or stalked                       | 1.99                                       | (1.34, 2.96)                | 2.07                                       | (1.39, 3.09)                |
| <i>Neighborhood-level fixed effects</i>                                          |                                            |                             |                                            |                             |
| % unemployed                                                                     | 0.99                                       | (0.99, 1.00)                | 1.00                                       | (0.99, 1.00)                |
| % in top 50% of country-level education                                          | 0.97                                       | (0.96, 0.99)                | 0.98                                       | (0.96, 0.99)                |
| Middle tertile of % who were sexually assaulted, raped, or stalked               | 1.07                                       | (0.85, 1.36)                |                                            |                             |
| Top tertile of % who were sexually assaulted, raped, or stalked                  | 1.28                                       | (0.99, 1.65)                |                                            |                             |
| Middle tertile of % who experienced any violent event                            |                                            |                             | 1.55                                       | (1.21, 1.99)                |
| Top tertile of % who experienced any violent event                               |                                            |                             | 1.50                                       | (1.18, 1.91)                |
| <i>Random effects</i>                                                            |                                            |                             |                                            |                             |
|                                                                                  | Variance estimate                          | Zero G test <i>p</i> -value | Variance estimate                          | Zero G test <i>p</i> -value |
| Intercept                                                                        | 0.0633                                     | 0.0027                      | 0.0366                                     | 0.1521                      |

<sup>a</sup> Anxiety disorders include posttraumatic stress disorder, panic disorder, specific phobia, social phobia, agoraphobia, adult separation anxiety, and generalized anxiety disorder.

<sup>b</sup> Each model controls for city as a fixed effect, in addition to the variables listed above.

<sup>c</sup> Any violent event includes the individual event types listed, in addition to having seen atrocities; being kidnapped or held captive; or having purposely injured, tortured, or killed someone else - each of which were too rare to model by themselves.

Web Appendix Table IX. Multilevel, multivariable logistic regression models with any past-year substance use disorder<sup>a</sup> as the dependent variable among 7,251 residents of 5 cities in Latin America.<sup>b</sup>

|                                                                                  | Beaten up by someone other than spouse or partner |              | Witnessed death or saw someone seriously hurt |              | Mugged or threatened with a weapon |              |
|----------------------------------------------------------------------------------|---------------------------------------------------|--------------|-----------------------------------------------|--------------|------------------------------------|--------------|
|                                                                                  | Odds ratio                                        | 95% CI       | Odds ratio                                    | 95% CI       | Odds ratio                         | 95% CI       |
| <i>Individual-level fixed effects</i>                                            |                                                   |              |                                               |              |                                    |              |
| Age 35-49                                                                        | 0.68                                              | (0.49, 0.93) | 0.68                                          | (0.50, 0.93) | 0.67                               | (0.49, 0.92) |
| Age 50+                                                                          | 0.36                                              | (0.21, 0.60) | 0.35                                          | (0.21, 0.51) | 0.36                               | (0.21, 0.60) |
| Female                                                                           | 0.20                                              | (0.14, 0.27) | 0.20                                          | (0.14, 0.27) | 0.20                               | (0.14, 0.27) |
| Ratio of individual income to median city income                                 | 0.99                                              | (0.93, 1.06) | 0.99                                          | (0.93, 1.06) | 0.99                               | (0.93, 1.06) |
| In top 50% of country-level education                                            | 0.60                                              | (0.42, 0.86) | 0.60                                          | (0.42, 0.86) | 0.60                               | (0.42, 0.86) |
| Married                                                                          | 0.79                                              | (0.56, 1.12) | 0.81                                          | (0.57, 1.15) | 0.79                               | (0.55, 1.12) |
| Migrant to megacity                                                              | 0.93                                              | (0.65, 1.34) | 0.95                                          | (0.66, 1.36) | 0.95                               | (0.66, 1.37) |
| Unemployed                                                                       | 2.46                                              | (1.61, 3.77) | 2.49                                          | (1.63, 3.83) | 2.47                               | (1.61, 3.80) |
| Beaten up by someone other than a spouse or partner                              | 3.59                                              | (2.11, 6.09) | 3.79                                          | (2.19, 6.55) | 3.90                               | (2.26, 6.74) |
| Witnessed someone being badly injured or killed, or unexpectedly saw a dead body | 2.13                                              | (1.47, 3.09) | 2.14                                          | (1.48, 3.10) | 2.15                               | (1.47, 3.12) |
| Mugged or threatened with a weapon                                               | 1.05                                              | (0.71, 1.54) | 1.04                                          | (0.71, 1.53) | 1.08                               | (0.74, 1.58) |
| Been raped, sexually assaulted other than rape, or stalked                       | 2.85                                              | (1.53, 5.31) | 2.77                                          | (1.47, 5.23) | 2.82                               | (1.51, 5.25) |
| <i>Neighborhood-level fixed effects</i>                                          |                                                   |              |                                               |              |                                    |              |
| % unemployed                                                                     | 1.02                                              | (0.98, 1.07) | 1.03                                          | (0.98, 1.07) | 1.03                               | (0.98, 1.07) |
| % in top 50% of country-level education                                          | 0.99                                              | (0.97, 1.01) | 1.00                                          | (0.98, 1.01) | 0.99                               | (0.98, 1.01) |
| Middle tertile of % who were beaten up by someone other than spouse or partner   | 0.88                                              | (0.61, 1.27) |                                               |              |                                    |              |
| Top tertile of % who were beaten up by someone other than spouse or partner      | 1.22                                              | (0.84, 1.78) |                                               |              |                                    |              |
| Middle tertile of % who witnessed death or saw someone seriously hurt            |                                                   |              | 1.01                                          | (0.70, 1.44) |                                    |              |
| Top tertile of % who witnessed death or saw someone seriously hurt               |                                                   |              | 1.12                                          | (0.76, 1.66) |                                    |              |

|                                                                 |                   |                             |                   |                             |                   |                             |
|-----------------------------------------------------------------|-------------------|-----------------------------|-------------------|-----------------------------|-------------------|-----------------------------|
| Middle tertile of % who were mugged or threatened with a weapon |                   |                             |                   |                             | 0.86              | (0.60, 1.22)                |
| Top tertile of % who were mugged or threatened with a weapon    |                   |                             |                   |                             | 0.86              | (0.58, 1.26)                |
| <i>Random effects</i>                                           | Variance estimate | Zero G test <i>p</i> -value | Variance estimate | Zero G test <i>p</i> -value | Variance estimate | Zero G test <i>p</i> -value |
| Intercept                                                       | 0.0683            | 0.1314                      | 0.0812            | 0.0746                      | 0.0835            | 0.0623                      |

<sup>a</sup> Substance use disorders include alcohol and drug abuse with or without dependence.

<sup>b</sup> Each model controls for city as a fixed effect, in addition to the variables listed above.

Appendix Table IX *continued*. Multilevel, multivariable logistic regression models with any past-year substance use disorder <sup>a</sup> as the dependent variable among 7,251 residents of 5 cities in Latin America. <sup>b</sup>

|                                                                                  | Been sexually assaulted, raped, or stalked |                             | Experienced any violent event <sup>c</sup> |                             |
|----------------------------------------------------------------------------------|--------------------------------------------|-----------------------------|--------------------------------------------|-----------------------------|
|                                                                                  | Odds ratio                                 | 95% CI                      | Odds ratio                                 | 95% CI                      |
| <i>Individual-level fixed effects</i>                                            |                                            |                             |                                            |                             |
| Age 35-49                                                                        | 0.68                                       | (0.49, 0.92)                | 0.68                                       | (0.50, 0.93)                |
| Age 50+                                                                          | 0.36                                       | (0.21, 0.59)                | 0.36                                       | (0.21, 0.59)                |
| Female                                                                           | 0.20                                       | (0.14, 0.27)                | 0.20                                       | (0.14, 0.27)                |
| Ratio of individual income to median city income                                 | 0.99                                       | (0.93, 1.06)                | 0.99                                       | (0.93, 1.06)                |
| In top 50% of country-level education                                            | 0.60                                       | (0.42, 0.85)                | 0.59                                       | (0.42, 0.85)                |
| Married                                                                          | 0.80                                       | (0.56, 1.13)                | 0.81                                       | (0.57, 1.15)                |
| Migrant to megacity                                                              | 0.96                                       | (0.67, 1.37)                | 0.95                                       | (0.66, 1.36)                |
| Unemployed                                                                       | 2.46                                       | (1.61, 3.78)                | 2.49                                       | (1.62, 3.81)                |
| Beaten up by someone other than a spouse or partner                              | 3.92                                       | (2.28, 6.75)                | 3.78                                       | (2.18, 6.55)                |
| Witnessed someone being badly injured or killed, or unexpectedly saw a dead body | 2.12                                       | (1.46, 3.09)                | 2.17                                       | (1.50, 3.16)                |
| Mugged or threatened with a weapon                                               | 1.05                                       | (0.71, 1.54)                | 1.06                                       | (0.72, 1.56)                |
| Been raped, sexually assaulted other than rape, or stalked                       | 2.74                                       | (1.46, 5.14)                | 2.79                                       | (1.48, 5.25)                |
| <i>Neighborhood-level fixed effects</i>                                          |                                            |                             |                                            |                             |
| % unemployed                                                                     | 1.02                                       | (0.98, 1.07)                | 1.03                                       | (0.99, 1.07)                |
| % in top 50% of country-level education                                          | 0.99                                       | (0.98, 1.01)                | 0.99                                       | (0.97, 1.01)                |
| Middle tertile of % who were sexually assaulted, raped, or stalked               | 1.08                                       | (0.75, 1.56)                |                                            |                             |
| Top tertile of % who were sexually assaulted, raped, or stalked                  | 1.13                                       | (0.80, 1.60)                |                                            |                             |
| Middle tertile of % who experienced any violent event                            |                                            |                             | 0.87                                       | (0.57, 1.32)                |
| Top tertile of % who experienced any violent event                               |                                            |                             | 0.82                                       | (0.56, 1.22)                |
| <i>Random effects</i>                                                            |                                            |                             |                                            |                             |
|                                                                                  | Variance estimate                          | Zero G test <i>p</i> -value | Variance estimate                          | Zero G test <i>p</i> -value |
| Intercept                                                                        | 0.0827                                     | 0.0680                      | 0.0794                                     | 0.0785                      |

<sup>a</sup> Substance use disorders include alcohol and drug abuse with or without dependence.

<sup>b</sup> Each model controls for city as a fixed effect, in addition to the variables listed above.

<sup>c</sup> Any violent event includes the individual event types listed, in addition to having seen atrocities; being kidnapped or held captive; or having purposely injured, tortured, or killed someone else - each of which were too rare to model by themselves.
